# Supplementary material
Source: Springer Nature journal article supplement (https://www.springermedizin.de/resource/supplementary/12943_2013_1214_MOESM10_ESM.pdf/9552416)

**A** Total HCC cases N=39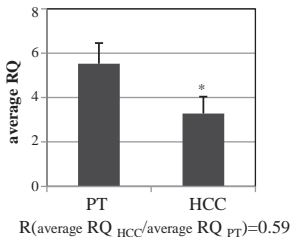**B**

## Non cirrhotic HCC N=14

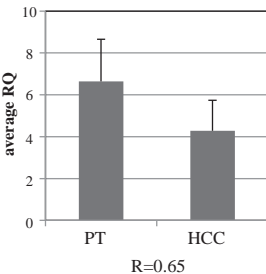**C**

## Cirrhotic HCC N=25

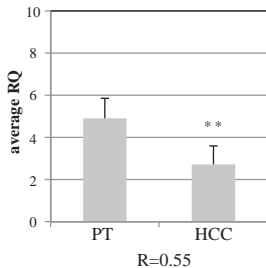**D**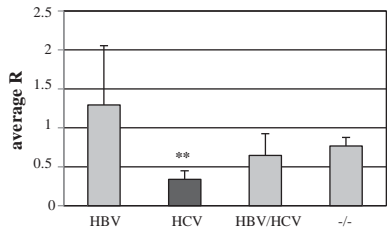

Supplement: MOESM10 [file 9552416]
